# Supplementary material for: Metabolomic Evidence for a Field Effect in Histologically Normal and Metaplastic Tissues in Patients with Esophageal Adenocarcinoma
Source: PubMed Central journal article supplement (PMC5288314; doi:10.1016/j.neo.2016.11.003), 2017-01-31
Supplement: mmc1.pdf [file mmc1.pdf]

| <b>Table S1: Models and statistical parameters used.</b>                                                                           |    |                 |          |          |          |          |          |             |
|------------------------------------------------------------------------------------------------------------------------------------|----|-----------------|----------|----------|----------|----------|----------|-------------|
| Model: Histologically normal tissue, from Barretts patients compared with controls ie Class 2 vs Class 1                           |    |                 |          |          |          |          |          |             |
| o-PLSDA Class 2 (7) vs Class 1 (68) : 1 Latent variable; ROC=0.94,CVER=0.10, p=0.18 (class 1),0.08 (class 2)                       |    |                 |          |          |          |          |          |             |
| Metabolite                                                                                                                         |    | test            | p-value  | Mean 1   | Mean 2   | Std 1    | Std 2    | Fold change |
| For                                                                                                                                | ** | Wilcoxon        | 1.90E-05 | 1.38E+06 | 4.93E+06 | 4.16E+05 | 2.12E+06 | 3.6         |
| Lac                                                                                                                                |    | Wilcoxon        | 4.60E-02 | 5.85E+06 | 8.21E+06 | 1.70E+06 | 4.11E+06 | 1.4         |
| Model: Barretts tissue compared with histologically normal tissue in Barretts patients ie Class 4 vs Class 2                       |    |                 |          |          |          |          |          |             |
| ML-PLSDA Class 4 (7) vs Class 2 (7) : ROC=1.00, CVER=0.00, p=0.005                                                                 |    |                 |          |          |          |          |          |             |
| Metabolite                                                                                                                         |    | test            | p-value  | Mean 1   | Mean 2   | Std 1    | Std 2    | Fold change |
| PCho                                                                                                                               |    | paired t-test   | 1.20E-02 | 2.97E+06 | 1.42E+07 | 9.80E+05 | 7.76E+06 | 4.8         |
| Myo                                                                                                                                |    | paired t-test   | 9.40E-03 | 4.32E+05 | 1.98E+06 | 1.73E+05 | 1.10E+06 | 4.6         |
| Hpox                                                                                                                               | *  | paired t-test   | 1.40E-03 | 2.01E+05 | 6.29E+05 | 1.43E+05 | 2.31E+05 | 3.1         |
| 3HB                                                                                                                                |    | paired t-test   | 2.10E-02 | 1.18E+05 | 3.09E+05 | 4.14E+04 | 1.72E+05 | 2.6         |
| glut                                                                                                                               |    | paired t-test   | 6.10E-03 | 1.62E+06 | 1.26E+06 | 4.46E+05 | 3.82E+05 | 0.8         |
| Asp                                                                                                                                |    | paired t-test   | 3.70E-02 | 8.82E+05 | 7.07E+05 | 2.80E+05 | 2.42E+05 | 0.8         |
| Fum                                                                                                                                |    | paired t-test   | 3.80E-02 | 4.76E+05 | 3.66E+05 | 1.90E+05 | 1.58E+05 | 0.8         |
| Lac                                                                                                                                |    | paired t-test   | 5.00E-02 | 8.21E+06 | 5.54E+06 | 4.11E+06 | 2.35E+06 | 0.7         |
| Gln                                                                                                                                | *  | paired t-test   | 1.10E-03 | 1.31E+06 | 7.79E+05 | 2.97E+05 | 3.51E+05 | 0.6         |
| ADP                                                                                                                                |    | paired Wilcoxon | 1.60E-02 | 6.01E+05 | 3.89E+05 | 1.67E+05 | 1.12E+05 | 0.6         |
| Ala                                                                                                                                |    | paired t-test   | 5.50E-03 | 8.13E+06 | 4.33E+06 | 2.58E+06 | 1.55E+06 | 0.5         |
| Model: Histologically normal tissue from OAC patients (pre-chemotherapy) compared with controls ie Class 3 vs Class 1              |    |                 |          |          |          |          |          |             |
| o-PLSDA Class 3 (30) vs Class 1 (68) : ROC=1.00, CVER=0.017, p=0.007 (class 1) ,0.005 (class 3)                                    |    |                 |          |          |          |          |          |             |
| Metabolite                                                                                                                         |    | test            | p-value  | Mean 1   | Mean 2   | Std 1    | Std 2    | Fold change |
| For                                                                                                                                | ** | Wilcoxon        | 3.90E-15 | 1.38E+06 | 5.87E+06 | 4.16E+05 | 2.54E+06 | 4.2         |
| 3HB                                                                                                                                | ** | Wilcoxon        | 7.80E-05 | 1.62E+05 | 2.85E+05 | 1.04E+05 | 1.64E+05 | 1.8         |
| Succ                                                                                                                               | ** | Wilcoxon        | 2.90E-04 | 9.68E+05 | 1.55E+06 | 3.98E+05 | 1.41E+06 | 1.6         |
| GPC                                                                                                                                | *  | Wilcoxon        | 3.90E-03 | 2.38E+06 | 3.50E+06 | 5.18E+05 | 3.01E+06 | 1.5         |
| Ace                                                                                                                                |    | Wilcoxon        | 1.40E-02 | 7.03E+06 | 9.24E+06 | 3.04E+06 | 4.84E+06 | 1.3         |
| Lac                                                                                                                                | *  | Wilcoxon        | 4.10E-03 | 5.85E+06 | 7.53E+06 | 1.70E+06 | 3.16E+06 | 1.3         |
| ADP                                                                                                                                |    | welch test      | 2.10E-02 | 4.81E+05 | 5.90E+05 | 1.53E+05 | 2.28E+05 | 1.2         |
| Asn                                                                                                                                |    | Wilcoxon        | 2.40E-02 | 2.10E+04 | 1.67E+04 | 8.87E+03 | 1.09E+04 | 0.8         |
| Model: Barretts tissue compared with histologically normal tissue in OAC patients (pre-chemotherapy) ie Class 5 vs Class 3         |    |                 |          |          |          |          |          |             |
| -                                                                                                                                  |    |                 |          |          |          |          |          |             |
| Metabolite                                                                                                                         |    | test            | p-value  | Mean 1   | Mean 2   | Std 1    | Std 2    | Fold change |
| PCho                                                                                                                               |    | Wilcoxon        | 6.90E-03 | 5.79E+06 | 2.43E+07 | 6.88E+06 | 4.79E+06 | 4.2         |
| Myo                                                                                                                                |    | Wilcoxon        | 1.30E-02 | 7.75E+05 | 1.93E+06 | 8.09E+05 | 4.68E+05 | 2.5         |
| GPC                                                                                                                                |    | Wilcoxon        | 8.10E-03 | 3.50E+06 | 5.33E+06 | 3.01E+06 | 1.04E+06 | 1.5         |
| glut                                                                                                                               | ** | welch test      | 4.60E-04 | 1.63E+06 | 1.09E+06 | 4.59E+05 | 1.56E+05 | 0.7         |
| Val                                                                                                                                | *  | welch test      | 2.60E-03 | 9.86E+05 | 6.08E+05 | 2.63E+05 | 1.32E+05 | 0.6         |
| Ala                                                                                                                                | ** | welch test      | 1.90E-04 | 6.71E+06 | 3.71E+06 | 2.53E+06 | 7.81E+05 | 0.6         |
| Asp                                                                                                                                | *  | welch test      | 5.40E-04 | 6.43E+05 | 3.89E+05 | 2.24E+05 | 7.48E+04 | 0.6         |
| Lac                                                                                                                                |    | welch test      | 3.30E-02 | 7.53E+06 | 4.88E+06 | 3.16E+06 | 1.60E+06 | 0.6         |
| Gln                                                                                                                                | ** | welch test      | 1.00E-04 | 1.49E+06 | 6.21E+05 | 5.48E+05 | 2.06E+05 | 0.4         |
| Model: Barretts tissue in OAC patients (pre-chemotherapy) compared with Barretts tissue in Barretts patients ie Class 5 vs Class 4 |    |                 |          |          |          |          |          |             |

| o-PLSDA Class 5 (4) vs Class 4 (7) Cross-validation=leave one out : ROC=0.79, CVER=0.27, p=0.332, 0.464                                                      |    |            |          |          |          |          |          |             |
|--------------------------------------------------------------------------------------------------------------------------------------------------------------|----|------------|----------|----------|----------|----------|----------|-------------|
| Metabolite                                                                                                                                                   |    | test       | p-value  | Mean 1   | Mean 2   | Std 1    | Std 2    | Fold change |
| Ile                                                                                                                                                          |    | welch test | 2.70E-02 | 3.04E+05 | 2.23E+05 | 5.72E+04 | 4.24E+04 | 0.7         |
| Leu                                                                                                                                                          |    | Wilcoxon   | 4.20E-02 | 1.04E+06 | 6.06E+05 | 4.64E+05 | 7.83E+04 | 0.6         |
| Val                                                                                                                                                          |    | welch test | 1.80E-02 | 1.02E+06 | 6.08E+05 | 3.28E+05 | 1.32E+05 | 0.6         |
| Asp                                                                                                                                                          |    | welch test | 1.30E-02 | 7.07E+05 | 3.89E+05 | 2.42E+05 | 7.48E+04 | 0.5         |
| Model: OAC tissue compared with Barretts tissue in OAC patients (pre-chemotherapy) ie Class 6 vs Class 5                                                     |    |            |          |          |          |          |          |             |
| -                                                                                                                                                            |    |            |          |          |          |          |          |             |
| Metabolite                                                                                                                                                   |    | test       | p-value  | Mean 1   | Mean 2   | Std 1    | Std 2    | Fold change |
| Leu                                                                                                                                                          |    | Wilcoxon   | 2.40E-02 | 6.06E+05 | 1.02E+06 | 7.83E+04 | 5.17E+05 | 1.7         |
| Val                                                                                                                                                          |    | welch test | 8.50E-03 | 6.08E+05 | 9.04E+05 | 1.32E+05 | 2.92E+05 | 1.5         |
| Ile                                                                                                                                                          |    | Wilcoxon   | 4.30E-02 | 2.23E+05 | 3.36E+05 | 4.24E+04 | 1.34E+05 | 1.5         |
| Asp                                                                                                                                                          |    | welch test | 2.20E-02 | 3.89E+05 | 5.50E+05 | 7.48E+04 | 2.79E+05 | 1.4         |
| glut                                                                                                                                                         |    | welch test | 1.40E-02 | 1.09E+06 | 1.42E+06 | 1.56E+05 | 4.43E+05 | 1.3         |
| Gly                                                                                                                                                          |    | welch test | 9.00E-03 | 4.85E+06 | 6.24E+06 | 5.22E+05 | 2.15E+06 | 1.3         |
| PCho                                                                                                                                                         |    | Wilcoxon   | 2.40E-02 | 2.43E+07 | 1.43E+07 | 4.79E+06 | 9.02E+06 | 0.6         |
| Cr                                                                                                                                                           |    | Wilcoxon   | 4.30E-02 | 7.06E+06 | 4.38E+06 | 2.13E+06 | 2.42E+06 | 0.6         |
| Model: Barretts tissue compared with histologically normal tissue in OAC patients (post-chemotherapy) ie Class 8 vs Class 7                                  |    |            |          |          |          |          |          |             |
| -                                                                                                                                                            |    |            |          |          |          |          |          |             |
| Metabolite                                                                                                                                                   |    | test       | p-value  | Mean 1   | Mean 2   | Std 1    | Std 2    | Fold change |
| PCho                                                                                                                                                         | ** | Wilcoxon   | 2.80E-05 | 4.60E+06 | 1.80E+07 | 4.84E+06 | 6.36E+06 | 3.9         |
| Hpox                                                                                                                                                         | *  | Wilcoxon   | 2.00E-03 | 3.07E+05 | 4.53E+05 | 1.71E+05 | 1.13E+05 | 1.5         |
| GPC                                                                                                                                                          | *  | Wilcoxon   | 7.70E-04 | 4.30E+06 | 6.12E+06 | 3.33E+06 | 2.56E+06 | 1.4         |
| ino                                                                                                                                                          |    | Wilcoxon   | 2.60E-02 | 1.75E+05 | 2.30E+05 | 8.05E+04 | 5.85E+04 | 1.3         |
| Gly                                                                                                                                                          |    | welch test | 2.40E-02 | 8.91E+06 | 7.65E+06 | 2.36E+06 | 9.27E+05 | 0.9         |
| Val                                                                                                                                                          |    | Wilcoxon   | 1.60E-02 | 1.30E+06 | 1.09E+06 | 2.62E+05 | 2.00E+05 | 0.8         |
| Lac                                                                                                                                                          |    | welch test | 2.30E-02 | 1.26E+07 | 1.07E+07 | 2.34E+06 | 1.91E+06 | 0.8         |
| glut                                                                                                                                                         | *  | Wilcoxon   | 2.00E-03 | 1.40E+06 | 9.51E+05 | 3.74E+05 | 2.21E+05 | 0.7         |
| Gln                                                                                                                                                          |    | Wilcoxon   | 6.00E-03 | 1.42E+06 | 9.23E+05 | 3.76E+05 | 3.53E+05 | 0.7         |
| Cr                                                                                                                                                           | *  | welch test | 2.00E-03 | 9.01E+06 | 6.48E+06 | 1.76E+06 | 1.73E+06 | 0.7         |
| Ala                                                                                                                                                          | ** | welch test | 3.10E-08 | 8.06E+06 | 4.82E+06 | 2.19E+06 | 6.63E+05 | 0.6         |
| Succ                                                                                                                                                         | ** | welch test | 3.70E-07 | 3.90E+06 | 2.40E+06 | 1.07E+06 | 3.99E+05 | 0.6         |
| Fum                                                                                                                                                          | ** | welch test | 4.50E-04 | 3.56E+05 | 2.05E+05 | 1.34E+05 | 8.14E+04 | 0.6         |
| ADP                                                                                                                                                          |    | welch test | 6.70E-03 | 6.01E+05 | 3.63E+05 | 2.25E+05 | 1.91E+05 | 0.6         |
| Model: OAC tissue compared with Barretts tissue in OAC patients (post-chemotherapy) ie Class 9 vs Class 8                                                    |    |            |          |          |          |          |          |             |
| -                                                                                                                                                            |    |            |          |          |          |          |          |             |
| Metabolite                                                                                                                                                   |    | test       | p-value  | Mean 1   | Mean 2   | Std 1    | Std 2    | Fold change |
| Asn                                                                                                                                                          |    | Wilcoxon   | 1.20E-02 | 1.30E+04 | 3.10E+04 | 2.17E+04 | 2.22E+04 | 2.4         |
| Hpox                                                                                                                                                         |    | welch test | 2.40E-02 | 4.53E+05 | 6.22E+05 | 1.13E+05 | 3.26E+05 | 1.4         |
| glut                                                                                                                                                         | *  | welch test | 4.70E-03 | 9.51E+05 | 1.26E+06 | 2.21E+05 | 3.50E+05 | 1.3         |
| Myo                                                                                                                                                          |    | Wilcoxon   | 4.60E-02 | 2.47E+06 | 1.99E+06 | 7.03E+05 | 1.03E+06 | 0.8         |
| Cr                                                                                                                                                           |    | Wilcoxon   | 2.30E-02 | 6.48E+06 | 5.11E+06 | 1.73E+06 | 3.08E+06 | 0.8         |
| PCho                                                                                                                                                         |    | Wilcoxon   | 4.30E-02 | 1.80E+07 | 1.28E+07 | 6.36E+06 | 8.34E+06 | 0.7         |
| Model: Histologically normal tissue in OAC patients (pre-chemotherapy) compared with histologically normal tissue in Barretts patients ie Class 3 vs Class 2 |    |            |          |          |          |          |          |             |
| o-PLSDA Class 3 (30) vs Class 2 (7) : dreadful model, 3 LVs ROC=0.70, CVER=0.28, p=0.30,0.30                                                                 |    |            |          |          |          |          |          |             |
| Metabolite                                                                                                                                                   |    | test       | p-value  | Mean 1   | Mean 2   | Std 1    | Std 2    | Fold change |

| 3HB                                                                                                                               | *  | Wilcoxon   | 3.90E-03 | 1.18E+05 | 2.85E+05 | 4.14E+04 | 1.64E+05 | 2.4         |
|-----------------------------------------------------------------------------------------------------------------------------------|----|------------|----------|----------|----------|----------|----------|-------------|
|                                                                                                                                   |    |            |          |          |          |          |          |             |
| Model: OAC tissue in OAC patients (pre-chemotherapy) compared with histologically normal tissue in controls ie Class 6 vs Class 1 |    |            |          |          |          |          |          |             |
| o-PLSDA Class 6 (27) vs Class 1 (68) : 1 LV, ROC=1.00, CVER=0.00, p=0.008 (class 6), 0.005 (class 1)                              |    |            |          |          |          |          |          |             |
| Metabolite                                                                                                                        |    | test       | p-value  | Mean 1   | Mean 2   | Std 1    | Std 2    | Fold change |
| PCho                                                                                                                              | ** | Wilcoxon   | 6.80E-10 | 2.94E+06 | 1.43E+07 | 7.67E+05 | 9.02E+06 | 4.9         |
| For                                                                                                                               | ** | Wilcoxon   | 4.70E-13 | 1.38E+06 | 5.31E+06 | 4.16E+05 | 2.26E+06 | 3.8         |
| 3HB                                                                                                                               | ** | Wilcoxon   | 2.30E-10 | 1.62E+05 | 5.19E+05 | 1.04E+05 | 3.75E+05 | 3.2         |
| GPC                                                                                                                               | ** | Wilcoxon   | 2.70E-10 | 2.38E+06 | 7.72E+06 | 5.18E+05 | 5.23E+06 | 3.2         |
| Hpox                                                                                                                              | ** | Wilcoxon   | 2.00E-09 | 2.34E+05 | 6.18E+05 | 1.62E+05 | 2.95E+05 | 2.6         |
| ino                                                                                                                               | ** | Wilcoxon   | 2.20E-07 | 9.26E+04 | 2.08E+05 | 9.13E+04 | 9.21E+04 | 2.3         |
| Myo                                                                                                                               | ** | Wilcoxon   | 7.80E-08 | 5.79E+05 | 1.28E+06 | 4.34E+05 | 5.53E+05 | 2.2         |
| Succ                                                                                                                              | *  | Wilcoxon   | 7.60E-04 | 9.68E+05 | 1.56E+06 | 3.98E+05 | 1.51E+06 | 1.6         |
| Leu                                                                                                                               |    | Wilcoxon   | 6.80E-03 | 7.57E+05 | 1.02E+06 | 3.18E+05 | 5.17E+05 | 1.3         |
| Ile                                                                                                                               |    | Wilcoxon   | 1.10E-02 | 2.67E+05 | 3.36E+05 | 9.45E+04 | 1.34E+05 | 1.3         |
| Ace                                                                                                                               |    | Wilcoxon   | 1.20E-02 | 7.03E+06 | 6.07E+06 | 3.04E+06 | 4.09E+06 | 0.9         |
| glut                                                                                                                              |    | welch test | 3.70E-02 | 1.62E+06 | 1.42E+06 | 3.56E+05 | 4.43E+05 | 0.9         |
| Asp                                                                                                                               |    | welch test | 3.00E-02 | 6.93E+05 | 5.50E+05 | 2.98E+05 | 2.79E+05 | 0.8         |
| Fum                                                                                                                               | ** | Wilcoxon   | 2.20E-05 | 3.95E+05 | 2.67E+05 | 1.43E+05 | 1.00E+05 | 0.7         |
| ADP                                                                                                                               | ** | Wilcoxon   | 6.20E-06 | 4.81E+05 | 3.16E+05 | 1.53E+05 | 1.53E+05 | 0.7         |
| Ala                                                                                                                               | ** | welch test | 8.60E-14 | 6.02E+06 | 3.64E+06 | 1.56E+06 | 9.67E+05 | 0.6         |
| Cr                                                                                                                                | ** | Wilcoxon   | 9.30E-08 | 7.01E+06 | 4.38E+06 | 1.54E+06 | 2.42E+06 | 0.6         |
| Gln                                                                                                                               | ** | welch test | 4.00E-17 | 1.44E+06 | 7.09E+05 | 3.48E+05 | 2.61E+05 | 0.5         |
|                                                                                                                                   |    |            |          |          |          |          |          |             |
| Model: OAC tissue compared with histologically normal tissue in OAC patients (pre-chemotherapy) ie Class 6 vs Class 3             |    |            |          |          |          |          |          |             |
| o-PLSDA Class 6 (27) vs Class 1 (68) : 1 LV, ROC=1.00, CVER=0.00, p=0.008 (class 6), 0.005 (class 1)                              |    |            |          |          |          |          |          |             |
| Metabolite                                                                                                                        |    | test       | p-value  | Mean 1   | Mean 2   | Std 1    | Std 2    | Fold change |
| PCho                                                                                                                              | ** | Wilcoxon   | 7.00E-05 | 5.79E+06 | 1.43E+07 | 6.88E+06 | 9.02E+06 | 2.5         |
| Hpox                                                                                                                              | ** | Wilcoxon   | 1.50E-06 | 2.69E+05 | 6.18E+05 | 1.60E+05 | 2.95E+05 | 2.3         |
| GPC                                                                                                                               | ** | Wilcoxon   | 1.80E-05 | 3.50E+06 | 7.72E+06 | 3.01E+06 | 5.23E+06 | 2.2         |
| 3HB                                                                                                                               | *  | Wilcoxon   | 1.20E-03 | 2.85E+05 | 5.19E+05 | 1.64E+05 | 3.75E+05 | 1.8         |
| ino                                                                                                                               | *  | Wilcoxon   | 5.70E-04 | 1.22E+05 | 2.08E+05 | 1.14E+05 | 9.21E+04 | 1.7         |
| Myo                                                                                                                               | ** | Wilcoxon   | 2.50E-04 | 7.75E+05 | 1.28E+06 | 8.09E+05 | 5.53E+05 | 1.6         |
| Gly                                                                                                                               |    | Wilcoxon   | 1.10E-02 | 4.95E+06 | 6.24E+06 | 1.94E+06 | 2.15E+06 | 1.3         |
| Pro                                                                                                                               |    | Wilcoxon   | 1.60E-02 | 7.32E+05 | 5.83E+05 | 5.97E+05 | 7.97E+05 | 0.8         |
| Lac                                                                                                                               |    | welch test | 1.20E-02 | 7.53E+06 | 5.78E+06 | 3.16E+06 | 1.79E+06 | 0.8         |
| Ace                                                                                                                               | ** | Wilcoxon   | 2.50E-04 | 9.24E+06 | 6.07E+06 | 4.84E+06 | 4.09E+06 | 0.7         |
| Fum                                                                                                                               | *  | Wilcoxon   | 2.70E-03 | 3.84E+05 | 2.67E+05 | 1.70E+05 | 1.00E+05 | 0.7         |
| Cr                                                                                                                                | ** | Wilcoxon   | 1.50E-05 | 6.82E+06 | 4.38E+06 | 1.72E+06 | 2.42E+06 | 0.6         |
| Ala                                                                                                                               | ** | welch test | 3.20E-07 | 6.71E+06 | 3.64E+06 | 2.53E+06 | 9.67E+05 | 0.5         |
| Gln                                                                                                                               | ** | welch test | 1.30E-08 | 1.49E+06 | 7.09E+05 | 5.48E+05 | 2.61E+05 | 0.5         |
| ADP                                                                                                                               | ** | Wilcoxon   | 5.70E-06 | 5.90E+05 | 3.16E+05 | 2.28E+05 | 1.53E+05 | 0.5         |
|                                                                                                                                   |    |            |          |          |          |          |          |             |
| Model: Histologically normal tissue in OAC patients, post-chemotherapy vs pre-chemotherapy ie Class 7 vs Class 3                  |    |            |          |          |          |          |          |             |
| o-PLSDA Class 7 (29) vs Class 3 (27) : 1 LV, ROC=1.00, CVER=0.00, p=0.005,0.005                                                   |    |            |          |          |          |          |          |             |
| Metabolite                                                                                                                        |    | test       | p-value  | Mean 1   | Mean 2   | Std 1    | Std 2    | Fold change |
| Myo                                                                                                                               | ** | Wilcoxon   | 3.10E-07 | 7.75E+05 | 2.00E+06 | 8.09E+05 | 7.62E+05 | 2.6         |
| Succ                                                                                                                              | ** | Wilcoxon   | 2.90E-09 | 1.55E+06 | 3.90E+06 | 1.41E+06 | 1.07E+06 | 2.5         |
| 3HB                                                                                                                               |    | Wilcoxon   | 4.60E-02 | 2.85E+05 | 6.42E+05 | 1.64E+05 | 6.48E+05 | 2.3         |

|     |    |            |          |          |          |          |          |     |
|-----|----|------------|----------|----------|----------|----------|----------|-----|
| Gly | ** | Wilcoxon   | 3.90E-08 | 4.95E+06 | 8.91E+06 | 1.94E+06 | 2.36E+06 | 1.8 |
| Lac | ** | welch test | 3.50E-09 | 7.53E+06 | 1.26E+07 | 3.16E+06 | 2.34E+06 | 1.7 |
| Asn |    | Wilcoxon   | 2.00E-02 | 1.67E+04 | 2.40E+04 | 1.09E+04 | 1.44E+04 | 1.4 |
| ino | *  | Wilcoxon   | 2.50E-03 | 1.22E+05 | 1.75E+05 | 1.14E+05 | 8.05E+04 | 1.4 |
| Leu | *  | welch test | 2.50E-03 | 7.83E+05 | 1.01E+06 | 2.55E+05 | 3.01E+05 | 1.3 |
| Val | ** | welch test | 2.50E-05 | 9.86E+05 | 1.30E+06 | 2.63E+05 | 2.62E+05 | 1.3 |
| Ile | *  | Wilcoxon   | 8.70E-04 | 2.77E+05 | 3.72E+05 | 9.32E+04 | 1.13E+05 | 1.3 |
| Cr  | ** | welch test | 1.10E-05 | 6.82E+06 | 9.01E+06 | 1.72E+06 | 1.76E+06 | 1.3 |
| Tyr | ** | welch test | 6.00E-05 | 2.16E+05 | 2.74E+05 | 4.47E+04 | 5.71E+04 | 1.3 |
| Ala |    | welch test | 3.20E-02 | 6.71E+06 | 8.06E+06 | 2.53E+06 | 2.19E+06 | 1.2 |
| GPC | ** | Wilcoxon   | 1.80E-04 | 3.50E+06 | 4.30E+06 | 3.01E+06 | 3.33E+06 | 1.2 |
| Tau |    | welch test | 1.10E-02 | 6.98E+06 | 8.18E+06 | 1.80E+06 | 1.69E+06 | 1.2 |
| Ace | ** | Wilcoxon   | 6.00E-06 | 9.24E+06 | 4.91E+06 | 4.84E+06 | 1.98E+06 | 0.5 |
| Pro | ** | Wilcoxon   | 6.10E-09 | 7.32E+05 | 2.58E+05 | 5.97E+05 | 1.40E+05 | 0.4 |
| Asp | ** | Wilcoxon   | 5.10E-09 | 6.43E+05 | 2.82E+05 | 2.24E+05 | 1.11E+05 | 0.4 |
| For | ** | Wilcoxon   | 2.70E-10 | 5.87E+06 | 1.31E+06 | 2.54E+06 | 9.16E+05 | 0.2 |

Model: OAC tissue in OAC patients, post-chemotherapy vs pre-chemotherapy ie Class 9 vs Class 6

o-PLSDA Class 9 (28) vs Class 6 (27) : 2 LVs, ROC=1.00, CVER=0.018,p=0.007,0.007

| Metabolite |    | test       | p-value  | Mean 1   | Mean 2   | Std 1    | Std 2    | Fold change |
|------------|----|------------|----------|----------|----------|----------|----------|-------------|
| Lac        | ** | welch test | 4.40E-12 | 5.78E+06 | 1.21E+07 | 1.79E+06 | 3.13E+06 | 2.1         |
| Ile        | ** | Wilcoxon   | 5.60E-05 | 3.36E+05 | 5.36E+05 | 1.34E+05 | 2.60E+05 | 1.6         |
| Succ       | ** | Wilcoxon   | 8.80E-06 | 1.56E+06 | 2.44E+06 | 1.51E+06 | 8.38E+05 | 1.6         |
| Myo        | *  | Wilcoxon   | 4.00E-03 | 1.28E+06 | 1.99E+06 | 5.53E+05 | 1.03E+06 | 1.6         |
| Asn        |    | Wilcoxon   | 3.40E-02 | 2.05E+04 | 3.10E+04 | 1.12E+04 | 2.22E+04 | 1.5         |
| Tyr        |    | Wilcoxon   | 7.50E-03 | 2.07E+05 | 2.95E+05 | 8.73E+04 | 1.51E+05 | 1.4         |
| Leu        | *  | Wilcoxon   | 3.80E-03 | 1.02E+06 | 1.33E+06 | 5.17E+05 | 6.36E+05 | 1.3         |
| Val        | *  | Wilcoxon   | 3.10E-03 | 9.04E+05 | 1.21E+06 | 2.92E+05 | 4.45E+05 | 1.3         |
| Ala        | *  | welch test | 1.90E-03 | 3.64E+06 | 4.59E+06 | 9.67E+05 | 1.21E+06 | 1.3         |
| Gly        | *  | welch test | 6.20E-04 | 6.24E+06 | 8.24E+06 | 2.15E+06 | 2.00E+06 | 1.3         |
| Ace        | *  | Wilcoxon   | 2.80E-03 | 6.07E+06 | 4.15E+06 | 4.09E+06 | 1.72E+06 | 0.7         |
| Fum        | *  | Wilcoxon   | 1.00E-03 | 2.67E+05 | 1.86E+05 | 1.00E+05 | 1.05E+05 | 0.7         |
| Asp        | ** | Wilcoxon   | 2.60E-04 | 5.50E+05 | 3.35E+05 | 2.79E+05 | 2.02E+05 | 0.6         |
| Pro        | ** | Wilcoxon   | 3.80E-06 | 5.83E+05 | 2.63E+05 | 7.97E+05 | 2.70E+05 | 0.5         |
| For        | ** | Wilcoxon   | 1.20E-09 | 5.31E+06 | 1.28E+06 | 2.26E+06 | 8.05E+05 | 0.2         |

Model: Histologically normal tissue vs OAC tissue in OAC patients, post-chemotherapy ie Class 9 vs Class 7

o-PLSDA Class 9 (28) vs Class 7 (29) : 1 LV, ROC=0.94, CVER=0.14, p=0.023 (Class 7),0.28 (Class 9)

| Metabolite |    | test       | p-value  | Mean 1   | Mean 2   | Std 1    | Std 2    | Fold change |
|------------|----|------------|----------|----------|----------|----------|----------|-------------|
| PCho       | ** | Wilcoxon   | 7.50E-06 | 4.60E+06 | 1.28E+07 | 4.84E+06 | 8.34E+06 | 2.8         |
| Hpox       | ** | Wilcoxon   | 9.30E-06 | 3.07E+05 | 6.22E+05 | 1.71E+05 | 3.26E+05 | 2           |
| GPC        | ** | Wilcoxon   | 8.10E-08 | 4.30E+06 | 7.68E+06 | 3.33E+06 | 3.31E+06 | 1.8         |
| ino        |    | Wilcoxon   | 1.10E-02 | 1.75E+05 | 2.55E+05 | 8.05E+04 | 1.42E+05 | 1.5         |
| Ile        | *  | Wilcoxon   | 1.40E-03 | 3.72E+05 | 5.36E+05 | 1.13E+05 | 2.60E+05 | 1.4         |
| Leu        |    | Wilcoxon   | 2.40E-02 | 1.01E+06 | 1.33E+06 | 3.01E+05 | 6.36E+05 | 1.3         |
| Asn        |    | Wilcoxon   | 3.70E-02 | 2.40E+04 | 3.10E+04 | 1.44E+04 | 2.22E+04 | 1.3         |
| Ala        | ** | welch test | 2.40E-09 | 8.06E+06 | 4.59E+06 | 2.19E+06 | 1.21E+06 | 0.6         |
| Succ       | ** | welch test | 4.40E-07 | 3.90E+06 | 2.44E+06 | 1.07E+06 | 8.38E+05 | 0.6         |
| Cr         | ** | Wilcoxon   | 1.40E-07 | 9.01E+06 | 5.11E+06 | 1.76E+06 | 3.08E+06 | 0.6         |
| Gln        | ** | Wilcoxon   | 1.40E-07 | 1.42E+06 | 7.61E+05 | 3.76E+05 | 2.70E+05 | 0.5         |
| Fum        | ** | Wilcoxon   | 2.30E-06 | 3.56E+05 | 1.86E+05 | 1.34E+05 | 1.05E+05 | 0.5         |
| ADP        | ** | Wilcoxon   | 1.20E-06 | 6.01E+05 | 2.73E+05 | 2.25E+05 | 1.72E+05 | 0.5         |

| Metabolite                                                                      |    | test            | p-value  | Mean 1   | Mean 2   | Std 1    | Std 2    | Fold change |
|---------------------------------------------------------------------------------|----|-----------------|----------|----------|----------|----------|----------|-------------|
| Model: 10 case model: Barretts vs histologically normal tissues in OAC patients |    |                 |          |          |          |          |          |             |
| ML-PLSDA model : ROC=1.00, CVER=0.00, p=0.00                                    |    |                 |          |          |          |          |          |             |
| PCho                                                                            | ** | paired t-test   | 6.40E-05 | 3.46E+06 | 1.99E+07 | 6.03E+05 | 7.43E+06 | 5.7         |
| ino                                                                             |    | paired t-test   | 1.10E-02 | 1.35E+05 | 2.37E+05 | 5.42E+04 | 7.13E+04 | 1.8         |
| Hpox                                                                            | *  | paired t-test   | 1.20E-03 | 2.45E+05 | 4.37E+05 | 7.51E+04 | 1.34E+05 | 1.8         |
| GPC                                                                             | *  | paired Wilcoxon | 2.00E-03 | 3.39E+06 | 5.68E+06 | 4.81E+05 | 2.13E+06 | 1.7         |
| Myo                                                                             | *  | paired t-test   | 4.60E-03 | 1.26E+06 | 2.19E+06 | 5.99E+05 | 5.15E+05 | 1.7         |
| 3HB                                                                             | *  | paired Wilcoxon | 2.00E-03 | 6.34E+05 | 9.24E+05 | 7.80E+05 | 9.48E+05 | 1.5         |
| Val                                                                             |    | paired t-test   | 1.70E-02 | 1.21E+06 | 9.91E+05 | 2.73E+05 | 2.98E+05 | 0.8         |
| Cr                                                                              |    | paired t-test   | 3.70E-02 | 8.31E+06 | 6.48E+06 | 1.92E+06 | 1.96E+06 | 0.8         |
| Lac                                                                             |    | paired t-test   | 6.60E-03 | 1.10E+07 | 8.76E+06 | 4.02E+06 | 3.68E+06 | 0.8         |
| glut                                                                            | *  | paired t-test   | 5.90E-04 | 1.48E+06 | 1.00E+06 | 3.74E+05 | 2.36E+05 | 0.7         |
| Ala                                                                             | ** | paired t-test   | 6.40E-06 | 8.19E+06 | 4.52E+06 | 1.51E+06 | 9.66E+05 | 0.6         |
| Succ                                                                            | *  | paired t-test   | 2.70E-03 | 3.01E+06 | 1.92E+06 | 1.49E+06 | 7.68E+05 | 0.6         |
| Fum                                                                             | *  | paired Wilcoxon | 2.00E-03 | 3.33E+05 | 2.11E+05 | 1.06E+05 | 8.28E+04 | 0.6         |
| ADP                                                                             |    | paired t-test   | 6.40E-03 | 6.52E+05 | 4.10E+05 | 2.09E+05 | 2.25E+05 | 0.6         |
| Gln                                                                             | ** | paired t-test   | 1.50E-04 | 1.81E+06 | 9.03E+05 | 2.84E+05 | 3.47E+05 | 0.5         |
| Model: 10 case model: OAC vs Barretts tissues in OAC patients                   |    |                 |          |          |          |          |          |             |
| ML-PLSDA model : ROC=0.85, CVER=0.29, p=0.055                                   |    |                 |          |          |          |          |          |             |
| Metabolite                                                                      |    | test            | p-value  | Mean 1   | Mean 2   | Std 1    | Std 2    | Fold change |
| Asn                                                                             |    | paired Wilcoxon | 5.90E-03 | 1.17E+04 | 2.66E+04 | 2.10E+04 | 1.06E+04 | 2.3         |
| Hpox                                                                            |    | paired t-test   | 5.30E-03 | 4.37E+05 | 8.25E+05 | 1.34E+05 | 3.30E+05 | 1.9         |
| GPC                                                                             |    | paired Wilcoxon | 9.80E-03 | 5.68E+06 | 8.99E+06 | 2.13E+06 | 3.28E+06 | 1.6         |
| glut                                                                            |    | paired t-test   | 2.20E-02 | 1.00E+06 | 1.34E+06 | 2.36E+05 | 2.56E+05 | 1.3         |
| Cr                                                                              |    | paired t-test   | 2.00E-02 | 6.48E+06 | 4.36E+06 | 1.96E+06 | 1.20E+06 | 0.7         |
| Pro                                                                             |    | paired Wilcoxon | 3.70E-02 | 4.35E+05 | 2.48E+05 | 2.89E+05 | 1.06E+05 | 0.6         |
| Ace                                                                             |    | paired Wilcoxon | 2.70E-02 | 7.06E+06 | 4.50E+06 | 4.52E+06 | 2.14E+06 | 0.6         |
| Model: 10 case model: OAC vs normal tissues in OAC patients                     |    |                 |          |          |          |          |          |             |
| Metabolite                                                                      |    | test            | p-value  | Mean 1   | Mean 2   | Std 1    | Std 2    | Fold change |
| PCho                                                                            | *  | paired t-test   | 9.80E-04 | 3.46E+06 | 1.80E+07 | 6.03E+05 | 9.84E+06 | 5.2         |
| Hpox                                                                            | ** | paired t-test   | 4.30E-04 | 2.45E+05 | 8.25E+05 | 7.51E+04 | 3.30E+05 | 3.4         |
| GPC                                                                             | ** | paired t-test   | 1.60E-04 | 3.39E+06 | 8.99E+06 | 4.81E+05 | 3.28E+06 | 2.7         |
| ino                                                                             | *  | paired t-test   | 7.20E-04 | 1.35E+05 | 2.79E+05 | 5.42E+04 | 9.43E+04 | 2.1         |
| 3HB                                                                             | *  | paired Wilcoxon | 2.00E-03 | 6.34E+05 | 9.23E+05 | 7.80E+05 | 1.01E+06 | 1.5         |
| Fum                                                                             |    | paired Wilcoxon | 9.80E-03 | 3.33E+05 | 2.26E+05 | 1.06E+05 | 5.79E+04 | 0.7         |
| Pro                                                                             |    | paired Wilcoxon | 2.00E-02 | 4.03E+05 | 2.48E+05 | 3.03E+05 | 1.06E+05 | 0.6         |
| Ala                                                                             | ** | paired t-test   | 2.70E-04 | 8.19E+06 | 4.55E+06 | 1.51E+06 | 1.44E+06 | 0.6         |
| Succ                                                                            | *  | paired t-test   | 4.90E-03 | 3.01E+06 | 1.91E+06 | 1.49E+06 | 8.24E+05 | 0.6         |

|                                                                                                                                                      |    |               |          |          |          |          |          |     |
|------------------------------------------------------------------------------------------------------------------------------------------------------|----|---------------|----------|----------|----------|----------|----------|-----|
| Cr                                                                                                                                                   | ** | paired t-test | 4.20E-04 | 8.31E+06 | 4.36E+06 | 1.92E+06 | 1.20E+06 | 0.5 |
| Gln                                                                                                                                                  | ** | paired t-test | 1.60E-05 | 1.81E+06 | 8.13E+05 | 2.84E+05 | 2.16E+05 | 0.4 |
| ADP                                                                                                                                                  | ** | paired t-test | 3.50E-04 | 6.52E+05 | 2.86E+05 | 2.09E+05 | 1.10E+05 | 0.4 |
|                                                                                                                                                      |    |               |          |          |          |          |          |     |
| 10 case model: OAC vs Barretts vs histologically normal tissues in OAC patients                                                                      |    |               |          |          |          |          |          |     |
| o-PLSDA model : 2 LVs, for the normal, Barretts and cancer classes respectively ROC=1.00,0.86,0.91 (OAC),<br>CVER=0.00,0.23,0.13, p=0.021,0.14,0.049 |    |               |          |          |          |          |          |     |

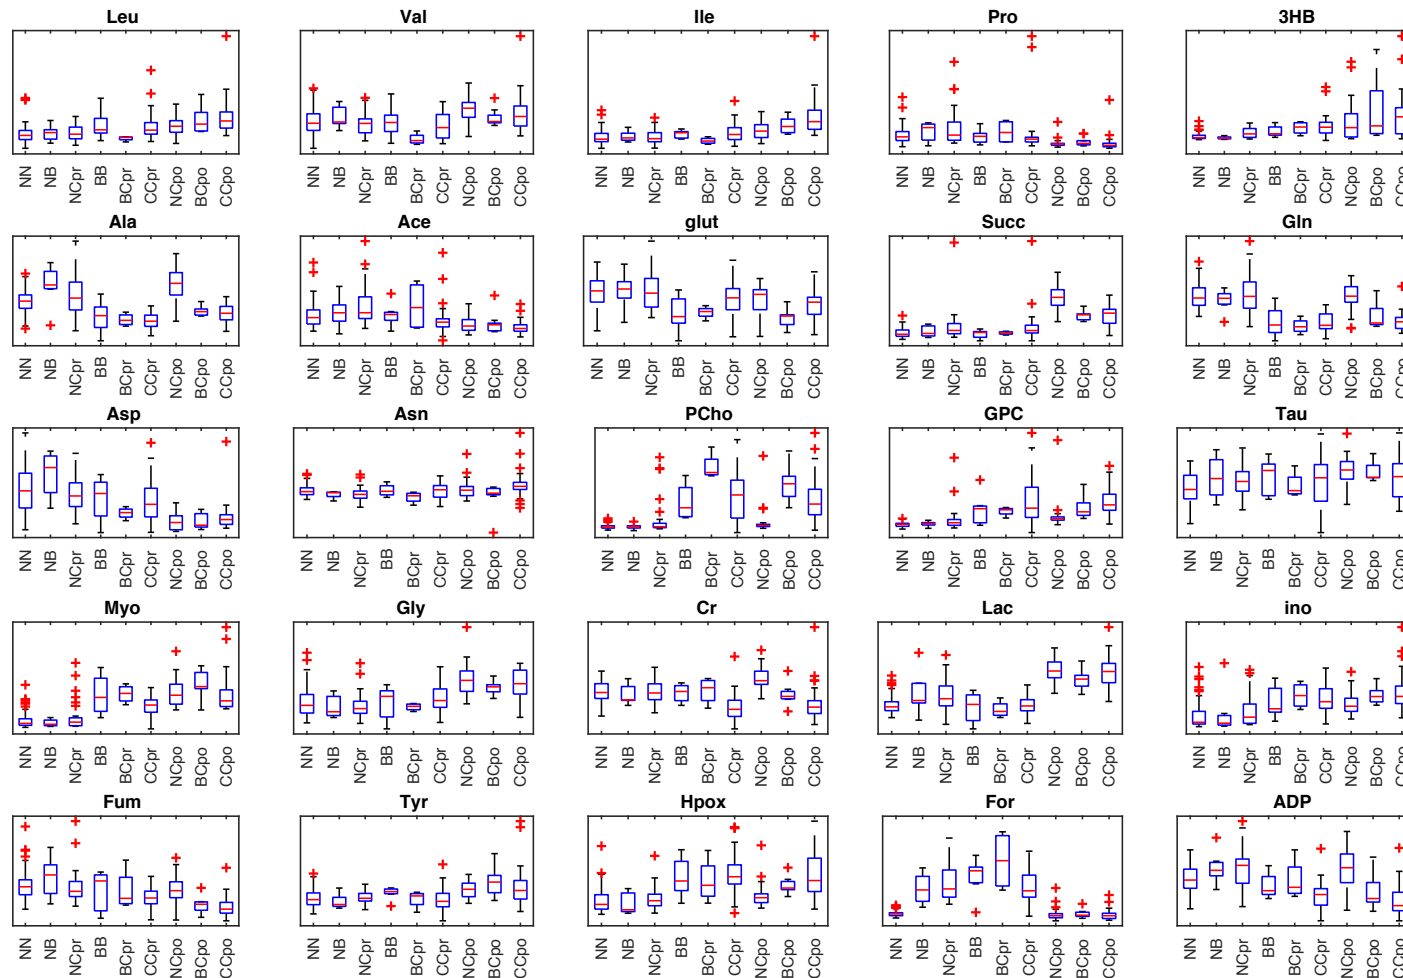

**Figure S1.** Boxplots to show metabolite levels measured via peak heights in spectra from 9 tissue types, boxes from left to right are for (1) NN; histologically normal tissue from controls; (2) NB; histologically normal tissue proximal to BO in BO patients; (3) NCpr; histologically normal tissue proximal to OAC in OAC patients, pre-chemotherapy; (4) BB; Barrett's tissue from BO patients; (5) BCpr; Barrett's tissue proximal to OAC in OAC patients, pre-chemotherapy; (6) CCpr; OAC tissue in OAC patients, pre-chemotherapy; (7) NCpo; histologically normal tissue proximal to OAC in OAC patients, post-chemotherapy; (8) BCpo; Barrett's tissue proximal to OAC in OAC patients, post-chemotherapy; (9) CCpo; OAC tissue in OAC patients, post-chemotherapy.

Red line=median (not mean); blue box=interquartile range; whiskers=all data not considered to be outliers; red cross=outliers (outliers is more than 1.5 times the interquartile range away from top or bottom of the box, by default ).

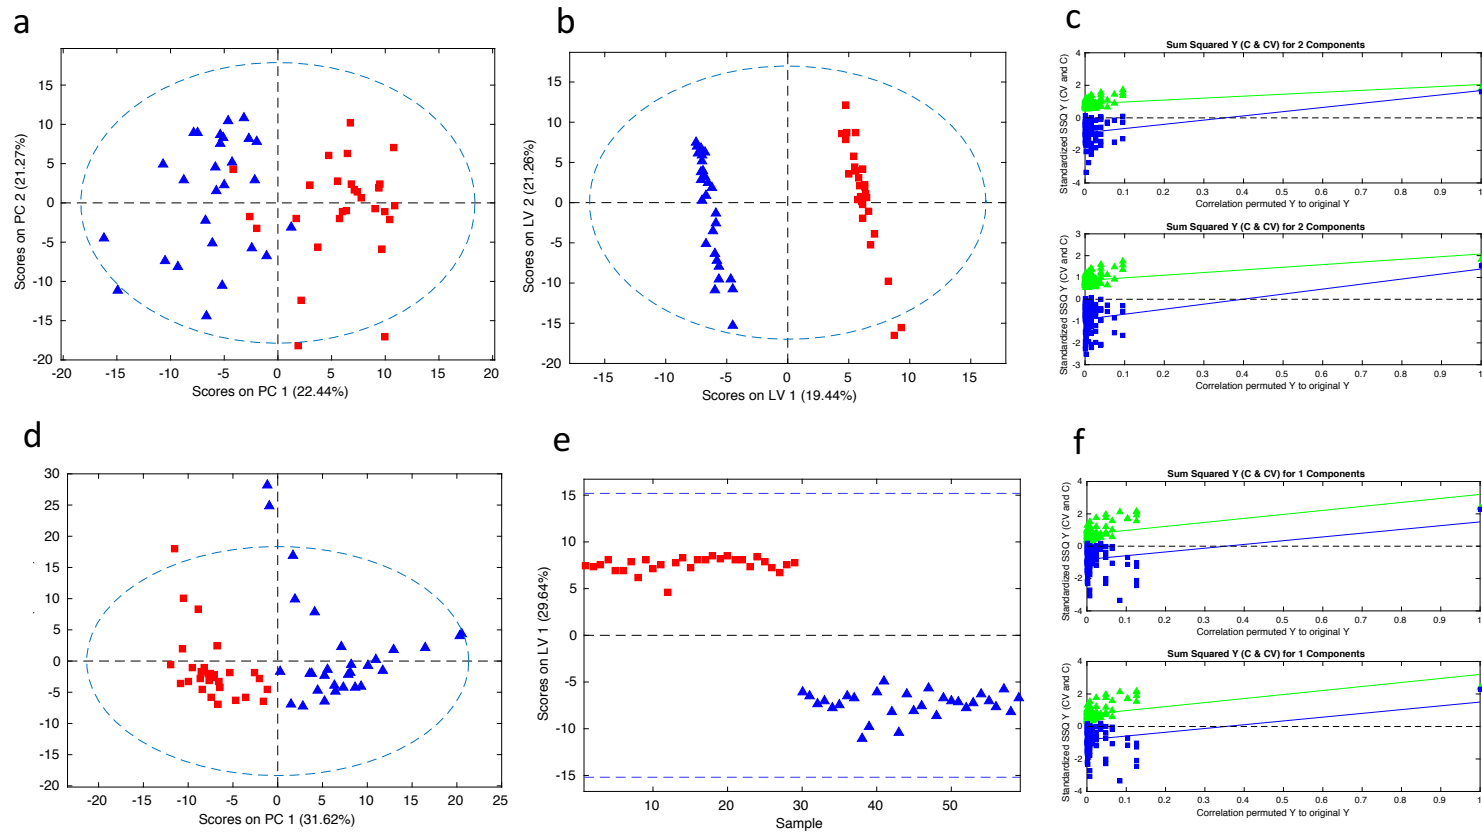

**Figure S2:** Multivariate analysis of the effect of chemotherapy

- Scores plot for PCA model for OAC tissue in OAC patients, pre- and post-chemotherapy
  - Scores plot for PLS-DA model for OAC tissue in OAC patients, pre- and post-chemotherapy
  - Permutation test n=100 for cancer tissue PLS-DA model, pre- and post-chemotherapy
  - Scores plot for PCA model for normal tissue in OAC patients, pre- and post-chemotherapy
  - Scores plot for PLS-DA model for normal tissue in OAC patients, pre- and post-chemotherapy
  - Permutation test n=100 for normal tissue in OAC patients, pre- and post-chemotherapy
- Pre-chemotherapy: blue triangles, post-chemotherapy: red squares



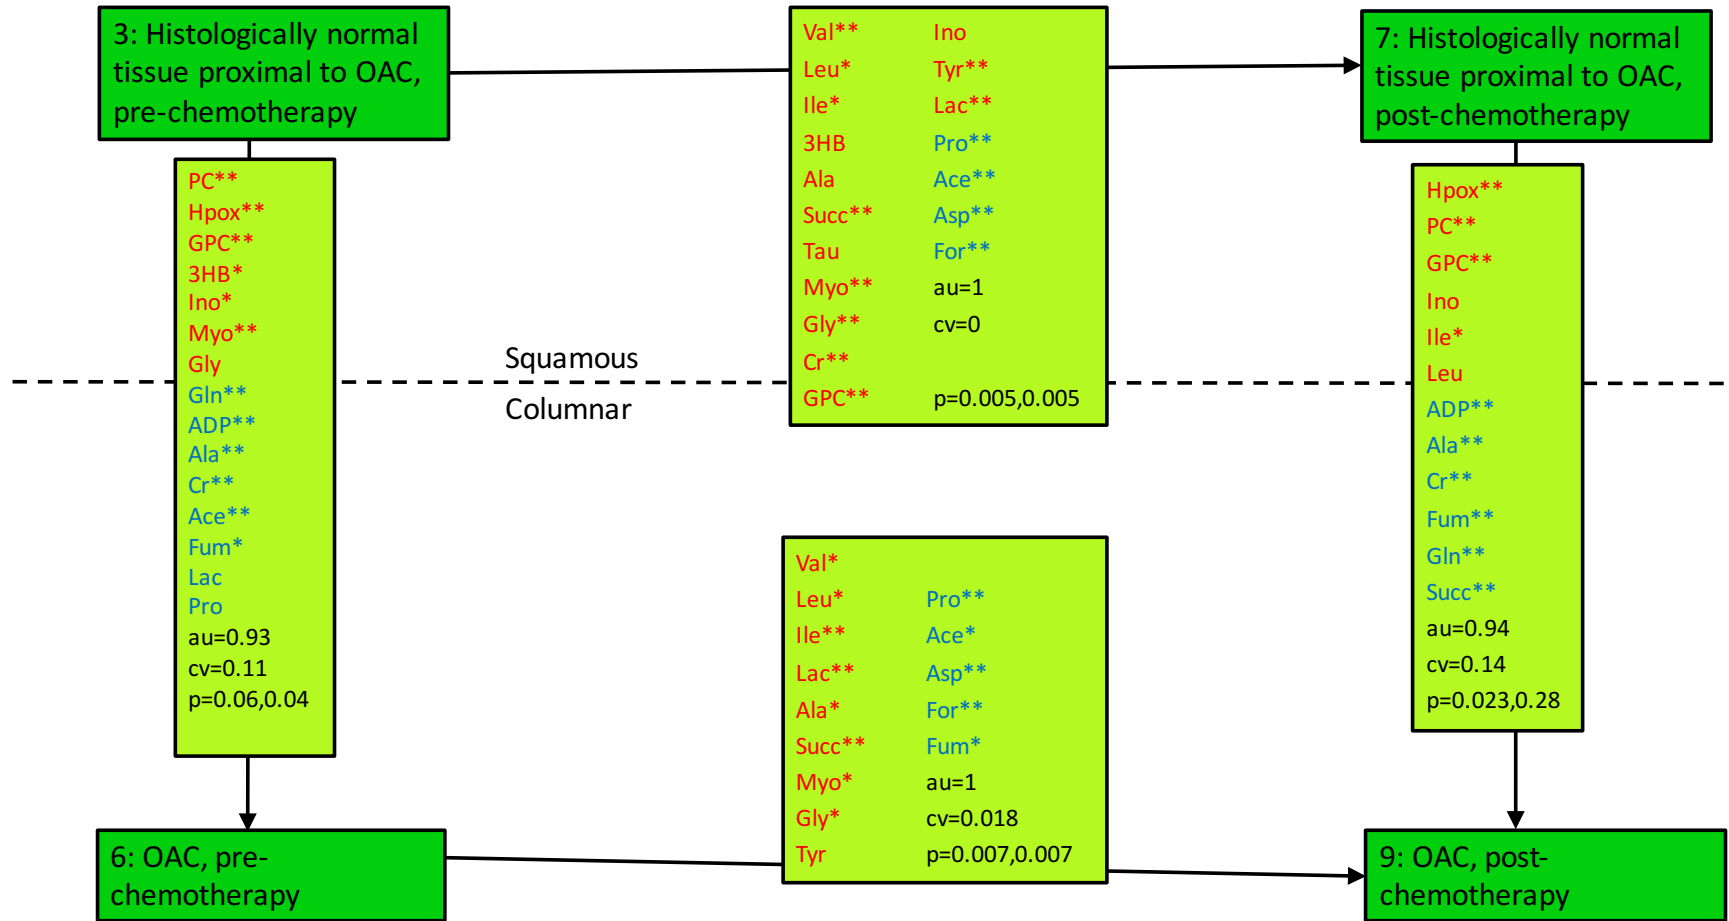

**Figure S3:** Effect of chemotherapy

\* denotes  $p < 0.005$

\*\* denotes  $p < 0.0005$

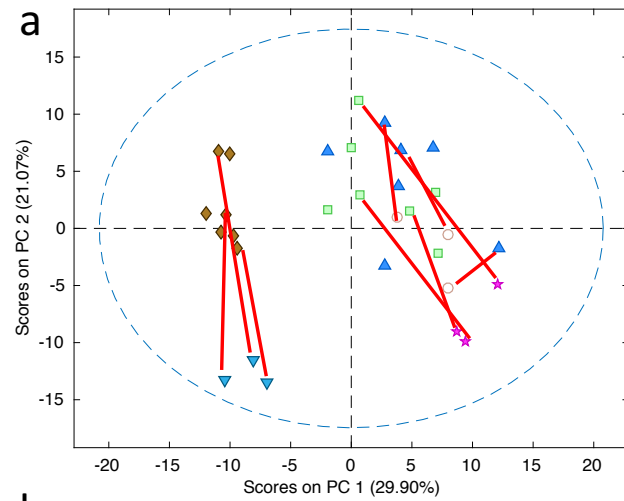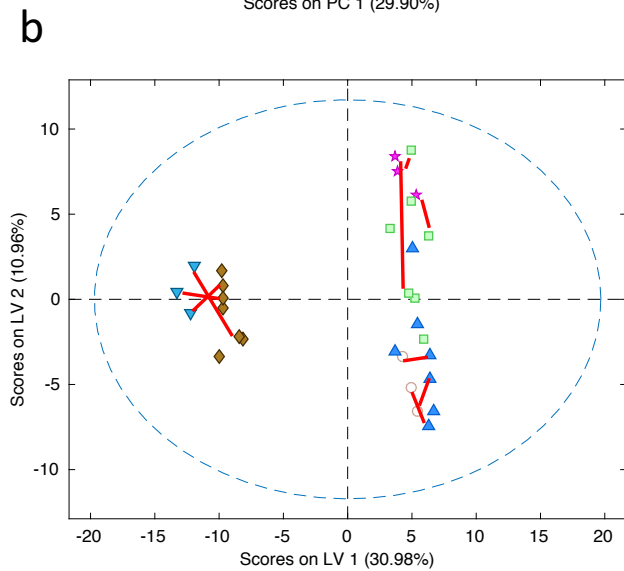

**Figure S4:**

The Effect of chemotherapy on the PCA and PLS-DA models to separate histologically normal, Barrett's and OAC tissues in OAC patients.

In the PCA model, there was a clear effect of chemotherapy causing an increase in the score in PC2. However, in the PLS-DA model, the only trend observed was that normal tissues, but not other tissue types, separated to some degree in LV1 according to chemotherapy status. The PLS-DA model did not appear to be overly distorted by chemotherapy.

a) Scores plot for PCA model\*

b) Scores plot for PLS-DA model\*

- colour-coding as follow: brown diamonds and dull blue triangles = post- and pre-chemo normal tissue, respectively; green squares and pink stars= post- and pre-chemo Barrett's tissue, respectively; brighter blue triangles and white circles= post- and pre-chemo cancer tissue, respectively.

Red lines link same tissue type in same patient pre- and post-chemo
